# Supplementary material for: Non-Woven Fibrous Polylactic Acid/Hydroxyapatite Nanocomposites Obtained via Solution Blow Spinning: Morphology, Thermal and Mechanical Behavior
Source: MDPI journal article supplement (doi:10.3390/nano14020196), 2024-01-15
Supplement: s1 [file s1]

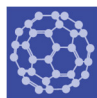

Supplementary Materials

# Non-Woven Fibrous Polylactic Acid/Hydroxyapatite Nanocomposites Obtained via Solution Blow Spinning: Morphology, Thermal and Mechanical Behavior

Javier González-Benito <sup>1,2</sup>, Stephania Zuñiga-Prado <sup>1</sup>, Julian Najera <sup>3</sup> and Dania Olmos <sup>1,2,\*</sup>

<sup>1</sup> Department of Materials Science and Engineering and Chemical Engineering, Instituto de Química y Materiales Álvaro Alonso Barba (IQMAA), Universidad Carlos III de Madrid, Avda. Universidad 30, 28911 Leganés, Madrid, Spain; [javid@ing.uc3m.es](mailto:javid@ing.uc3m.es) (J.G.-B.); [stzuniga@ing.uc3m.es](mailto:stzuniga@ing.uc3m.es) (S.Z.-P.)

<sup>2</sup> Instituto de Química y Materiales Álvaro Alonso Barba (IQMAA), Universidad Carlos III de Madrid, Avda. Universidad 30, 28911 Leganés, Madrid, Spain;

<sup>3</sup> Department of Aerospace & Mechanical Engineering, University of Notre Dame, Notre Dame, IN 46556, USA; [jnajera2@nd.edu](mailto:jnajera2@nd.edu)

\* Correspondence: [dolmos@ing.uc3m.es](mailto:dolmos@ing.uc3m.es)

### 3.1. Structural and Morphological Characterization

**Figure S1** shows the SEM images for the PLA/HA samples filled with 1%, 2% and 5 % NPs at different magnifications (100× and 5000×).

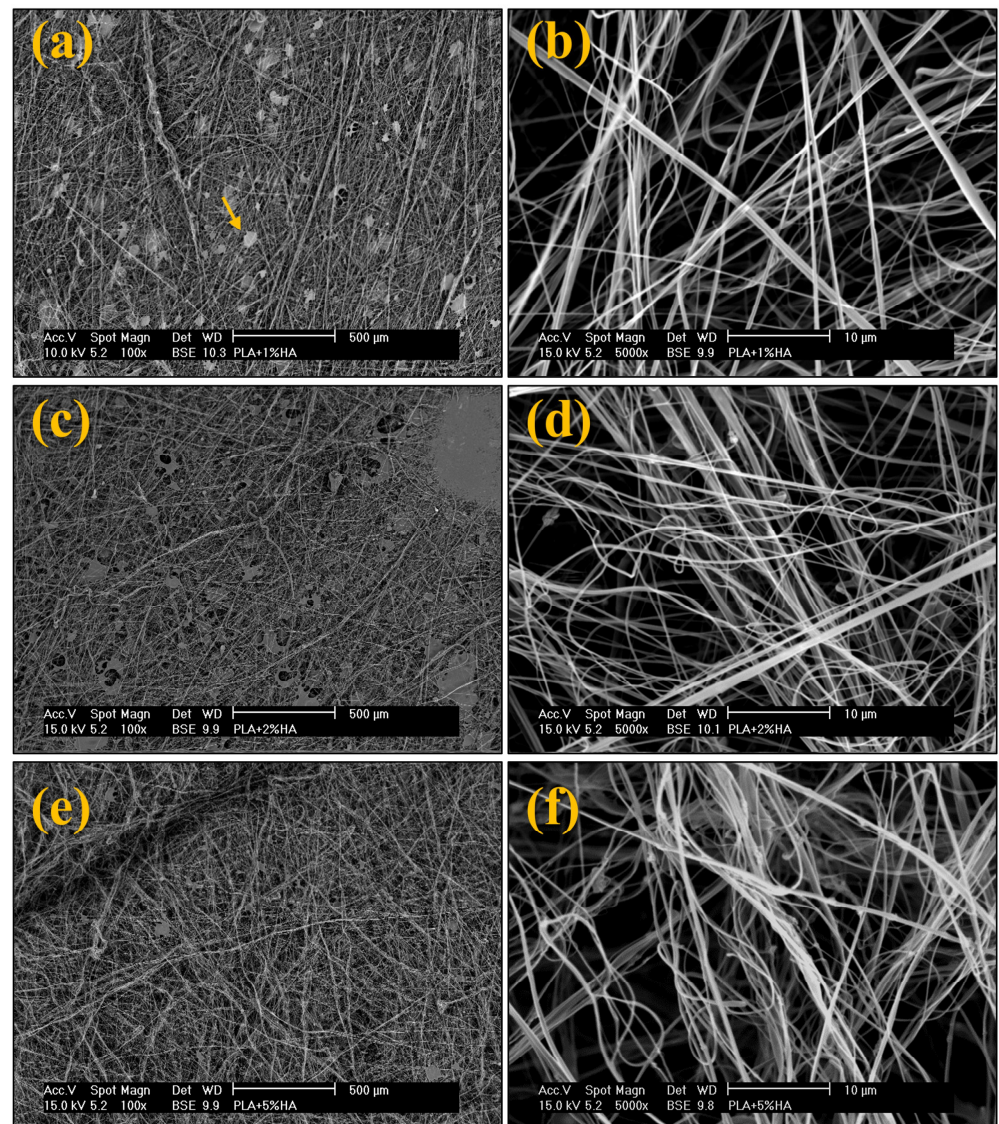

**Figure S1.** SEM images of various polylactic acid/hydroxyapatite (PLA/HA) samples: a), b) PLA + 1% HA; c), d) PLA + 2% HA and e), f) PLA + 5% HA at 100× (left) and at 5000× (right).

### 3.3. Mechanical Characterization

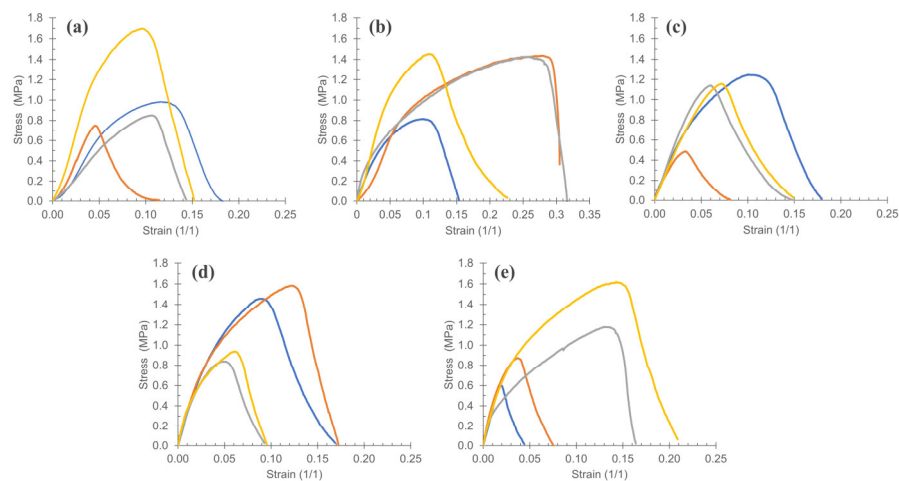

**Figure S2.** Stress–strain curves for poly(lactic acid) (PLA) and PLA/hydroxyapatite (HA) nanocomposites: (a) PLA, (b) PLA+1% HA, (c) PLA+2% HA, (d) PLA+5% HA, and (e) PLA+10% HA.

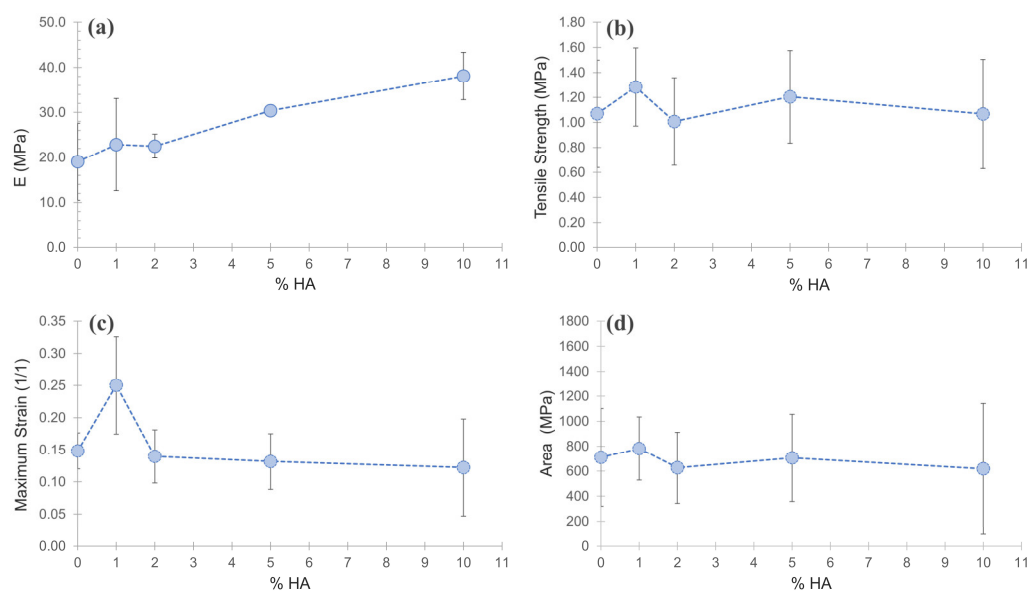

**Figure S3.** Average mechanical properties obtained for poly(lactic acid)/hydroxyapatite (HA) systems as functions of HA particle content: a) Elastic Modulus, E (MPa); b) Tensile strength (MPa); c) Maximum strain (1/1) and d) Area under the curve (MPa).
